# Supplementary material for: Economics and global warming potential of a commercial-scale delignifying biorefinery based on co-solvent enhanced lignocellulosic fractionation to produce alcohols, sustainable aviation fuels, and co-products from biomass
Source: Royal Society of Chemistry journal article supplement (doi:10.1039/d3ee02532b), 2023-12-13
Supplement: d3ee02532b1.pdf [file d3ee02532b1.pdf]

**Electronic Supplementary Material to:**

**Economics and global warming potential of a commercial-scale delignifying  
biorefinery based on CELF pretreatment**

Bruno Colling Klein <sup>a,b</sup>, Brent Scheidemantle <sup>b,c,d</sup>, Rebecca Hanes <sup>b,e</sup>, Andrew W.  
Bartling <sup>a,b</sup>, Nicholas Grundl <sup>a,b</sup>, Robin Clark <sup>a,f</sup>, Mary Bidy <sup>a,b</sup>, Ling Tao <sup>a,b</sup>, Cong  
Trinh <sup>b,g</sup>, Adam Guss <sup>b,h</sup>, Charles E. Wyman <sup>b,c,d</sup>, Arthur J. Ragauskas <sup>b,g,i</sup>, Erin G Webb  
<sup>b,f</sup>, Brian H. Davison <sup>b,h</sup>, Charles M. Cai <sup>b,c,d\*</sup>

<sup>a</sup> Catalytic Carbon Transformation & Scale-up Center, National Renewable Energy  
Laboratory, Golden, CO 80401, USA

<sup>b</sup> Center for Bioenergy Innovation (CBI), Oak Ridge National Laboratory (ORNL), Oak  
Ridge, TN 37831, USA

<sup>c</sup> Department of Chemical and Environmental Engineering, Bourns College of  
Engineering, University of California, Riverside, 900 University Ave, Riverside, CA  
92521, USA

<sup>d</sup> Center for Environmental Research and Technology, Bourns College of Engineering,  
University of California, Riverside, 1084 Columbia Avenue, Riverside, CA 92507,  
USA

<sup>e</sup> Strategic Energy Analysis Center, National Renewable Energy  
Laboratory, Golden, CO 80401, USA

<sup>f</sup> Environmental Sciences Division, Oak Ridge National Laboratory (ORNL), 1 Bethel  
Valley Road, Oak Ridge, Tennessee 37830, USA

<sup>g</sup> Department of Chemical and Biomolecular Engineering, University of Tennessee,  
Knoxville, TN, USA

<sup>h</sup> Biosciences Division, Oak Ridge National Laboratory (ORNL), Oak Ridge, TN  
37831, USA

<sup>i</sup> Department of Forestry, Wildlife, and Fisheries, Center for Renewable Carbon, The  
University of Tennessee Institute of Agriculture, Knoxville, TN 37996, USA

## Biorefinery setup

Figure S1a depicts the overall integration between streams in biorefineries based on Cosolvent Enhanced Lignocellulosic Fractionation (CELf). Figure S1b shows a detailed flow diagram for CELf deconstruction of biomass with tetrahydrofuran (THF) and water as the solvents of choice, yielding three main streams:

- Cellulose-rich stream: recovered as the solid stream after solid-liquid separation of fractions after CELf deconstruction of biomass. Sent to conversion into isobutanol or ethanol via consolidated bioprocessing (CBP).
- Lignin-rich stream: water-insoluble (WIS) lignin precipitates from the aqueous solution after THF is removed with a distillation column for recycling purposes. This stream is sent directly to conversion via athermic oxygen removal (AOR) in supercritical methanol.
- Hemicellulose-rich stream: this stream contains several soluble organic compounds, mainly pentoses, water-soluble (WS) lignin, organic acids, and 1,4-butanediol (1,4-BDO). During CELf deconstruction of biomass, a small portion of THF (1%) is reversibly converted into 1,4-BDO. This byproduct of CELf reactions can be returned in full to the reactor and account for part of the organic solvent in the required THF:water ratio if the process configuration allows. In the biorefining context considered in this study, preparatory assessments deemed the recovery of 1,4-BDO from the main aqueous stream a highly costly alternative from an energy requirement standpoint due to the molecule's high boiling point (230 °C) and its low concentration in the process (~8 g/L). In this way, it has been chosen to design the biorefinery with 1,4-BDO being present in the hemicellulose-rich stream. Hemicellulose-derived sugars (pentoses) contained in this stream are initially converted to isobutyl acetate via a fed-batch, anaerobic fermentation using *Escherichia coli*. As other compounds in this stream remain untouched in this step, such as WS lignin, organic acids, and 1,4-BDO, spent medium from this operation is sent to muconic acid fermentation using *Pseudomonas putida*, as this microorganism can be engineered to biologically funnel aromatics [1] and diols [2] into muconic acid. This compound is then recovered from the fermentation broth and further converted into adipic acid.

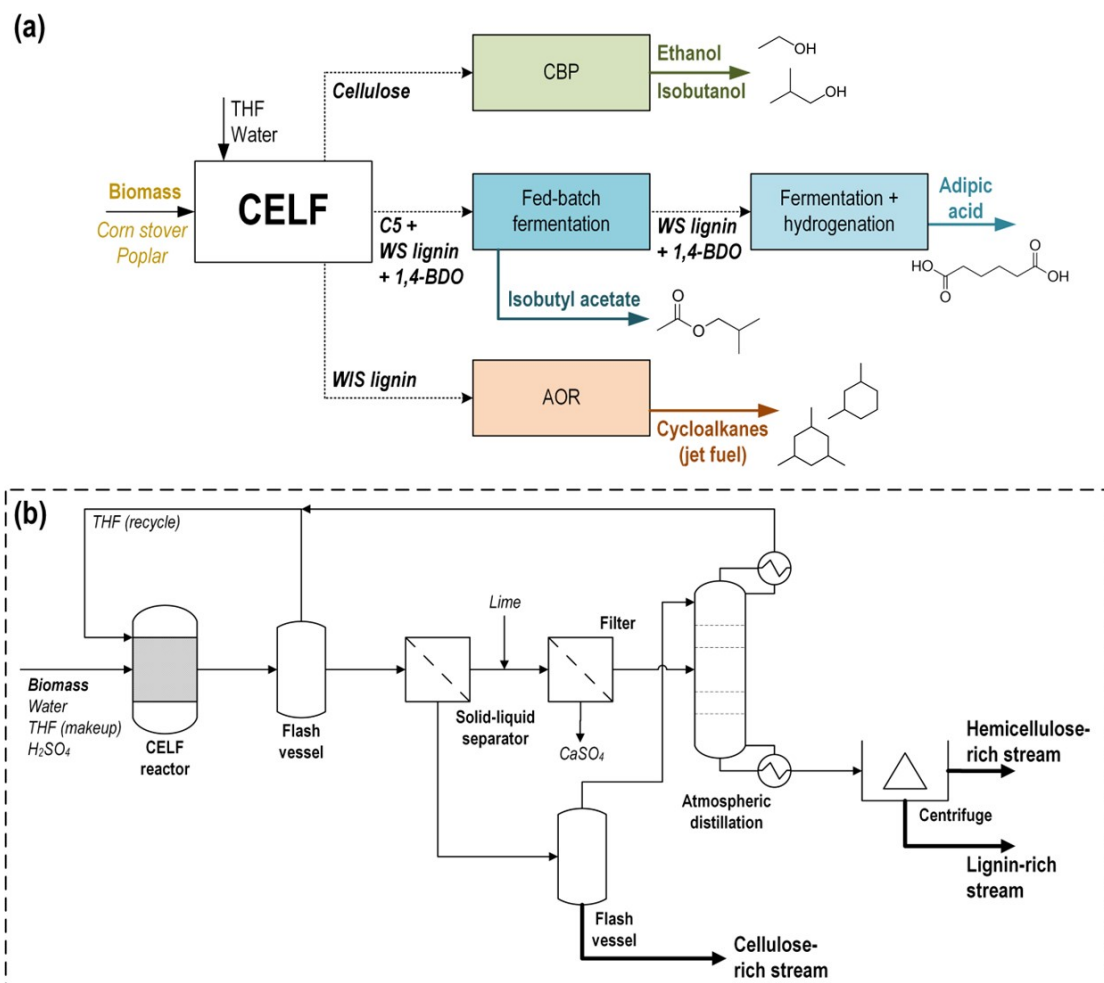

Figure S1. (a) Simplified block flow diagram for the proposed CELF-based biorefineries outlining the mass integration strategy. (b) Detailed flow diagram for the CELF deconstruction of lignocellulosic biomass.  
 1,4-BDO: 1,4-butanediol; AOR: Athermic Oxygen Removal; C5: pentoses; CBP: consolidated bioprocessing; CELF: Co-solvent Enhanced Lignocellulosic Fractionation; THF: tetrahydrofuran; WS: water soluble; WIS: water insoluble.

## Technical details

Table S1. Full biomass compositions (wt%).

| Component        | Corn stover | Poplar |
|------------------|-------------|--------|
| Hexoses          |             |        |
| <i>Glucan</i>    | 35.0%       | 50.4%  |
| <i>Galactan</i>  | 1.4%        | 0.7%   |
| <i>Mannan</i>    | 0.6%        | 2.9%   |
| Hemicellulose    |             |        |
| <i>Xylan</i>     | 19.5%       | 15.3%  |
| <i>Acetyl</i>    | 1.8%        | 2.0%   |
| Lignin           | 15.8%       | 21.8%  |
| Organic extracts | 14.6%       | 6.4%   |
| Sucrose          | 0.8%        | -      |
| Ash              | 4.9%        | 0.5%   |
| Protein          | 3.1%        | -      |

Table S2. Detailed modeling parameters.

| Parameter                                  | Value              |                     | Comments   |
|--------------------------------------------|--------------------|---------------------|------------|
|                                            | Poplar             | Corn stover         |            |
| <b>Biomass conditioning</b>                |                    |                     |            |
| Milling power requirement                  | 28 kWh/dry tonne   | 22 kWh/dry tonne    | [3]        |
|                                            |                    |                     |            |
| <b>CELF pretreatment</b>                   |                    |                     |            |
| Reaction temperature, pressure             | 160°C,<br>200 psig | 150 °C,<br>160 psig | [4-6]      |
| Solids loading                             | 20 wt%             |                     |            |
| THF to water ratio                         | 1:1                |                     |            |
| H <sub>2</sub> SO <sub>4</sub> loading     | 0.5%               |                     |            |
|                                            |                    |                     |            |
| <b>Biomass conversion</b>                  |                    |                     |            |
| <i>Cellulose to oligomers</i>              | 6.9%               | 5.9%                |            |
| <i>Cellulose to glucose</i>                | 7.2%               | 6.2%                |            |
| <i>Xylan to xylose</i>                     | 90.8%              | 91.2%               |            |
| <i>Xylan to furfural</i>                   | 1.5%               | 1.0%                |            |
| <i>Galactan to oligomers</i>               | 48.7%              | 48.7%               |            |
| <i>Galactan to galactose</i>               | 51.3%              | 51.3%               |            |
| <i>Acetate solubilization</i>              | 90.0%              | 90.0%               |            |
| <i>Lignin solubilization</i>               | 91.4%              | 76.6%               |            |
| <i>Reversible conversion of THF to BDO</i> | 1.0%               |                     |            |
|                                            |                    |                     |            |
| <b>CBP</b>                                 | <b>Ethanol</b>     | <b>Isobutanol</b>   |            |
| Solids loading                             |                    |                     | Assumption |
| <i>Poplar</i>                              | 13%                | 8.5%                |            |
| <i>Corn stover</i>                         | 20%                | 8.5%                |            |
| Titer                                      |                    |                     |            |
| <i>Poplar</i>                              | 61 g/L             | 30 g/L              |            |
| <i>Corn stover</i>                         | 75 g/L             | 23 g/L              |            |
| Component solubilization <sup>a</sup>      |                    |                     |            |
| <i>Poplar</i>                              | 95%                | 90%                 |            |

|                                                   |                                                                                                                           |              |                                                                                 |
|---------------------------------------------------|---------------------------------------------------------------------------------------------------------------------------|--------------|---------------------------------------------------------------------------------|
| <i>Corn stover</i>                                | 95%                                                                                                                       | 90%          |                                                                                 |
| Component conversion <sup>b</sup>                 |                                                                                                                           |              |                                                                                 |
| <i>Poplar</i>                                     |                                                                                                                           |              |                                                                                 |
| <b>Glucose</b>                                    | <b>98%</b>                                                                                                                | <b>98%</b>   |                                                                                 |
| <b>Xylose</b>                                     | <b>93.1%</b>                                                                                                              | <b>92.7%</b> |                                                                                 |
| <b>Arabinose</b>                                  | <b>88.2%</b>                                                                                                              | <b>88.7%</b> |                                                                                 |
| <i>Corn stover</i>                                |                                                                                                                           |              |                                                                                 |
| <b>Glucose</b>                                    | <b>98%</b>                                                                                                                | <b>98%</b>   |                                                                                 |
| <b>Xylose</b>                                     | <b>93.1%</b>                                                                                                              | <b>92.7%</b> |                                                                                 |
| <b>Arabinose</b>                                  | <b>88.2%</b>                                                                                                              | <b>88.7%</b> |                                                                                 |
|                                                   |                                                                                                                           |              |                                                                                 |
| <b>AOR</b>                                        |                                                                                                                           |              |                                                                                 |
| Component conversion                              |                                                                                                                           |              |                                                                                 |
| <i>MeOH</i> → <i>H<sub>2</sub></i> + <i>CO</i>    | 6%                                                                                                                        |              | [7, 8]                                                                          |
| <i>Lignin</i> → <i>Cycloalkanes</i> + <i>MeOH</i> | 95%                                                                                                                       |              |                                                                                 |
| Reaction temperature, pressure                    | 300 °C, 160 bar                                                                                                           |              |                                                                                 |
| WHSV                                              | 5 h <sup>-1</sup>                                                                                                         |              | Assumptions for continuous operation                                            |
| Methanol to lignin ratio                          | 10 L/kg                                                                                                                   |              |                                                                                 |
|                                                   |                                                                                                                           |              |                                                                                 |
| <b>Fermentation to isobutyl acetate</b>           |                                                                                                                           |              |                                                                                 |
| Base reaction <sup>c</sup>                        | Glucose + 0.07 NH <sub>3</sub> → 0.39 DCW + 0.62 IBA + 1.87 CO <sub>2</sub> + 1.24 H <sub>2</sub> + 0.78 H <sub>2</sub> O |              | Estimates based on a separate spreadsheet for dedicated fed-batch fermentations |
| Glucose/xylose conversion                         | 97%                                                                                                                       |              |                                                                                 |
| Productivity                                      | 0.79 g/L/h                                                                                                                |              |                                                                                 |
| IBA recovery in LLE                               | 96%                                                                                                                       |              |                                                                                 |
|                                                   |                                                                                                                           |              |                                                                                 |
| <b>Fermentation to muconic acid</b>               |                                                                                                                           |              |                                                                                 |
| Volumetric productivity                           | 1 g/L/h                                                                                                                   |              | Estimates based on [9]                                                          |
| Substrate utilization                             | 98%                                                                                                                       |              |                                                                                 |
| Ratio of C diverted to product                    |                                                                                                                           |              |                                                                                 |
| <i>From aromatics and acids</i>                   | 100%                                                                                                                      |              |                                                                                 |
| <i>From sugars and other organic molecules</i>    | 54%                                                                                                                       |              |                                                                                 |
|                                                   |                                                                                                                           |              |                                                                                 |
| <b>Upgrading to adipic acid</b>                   | Follows the concept presented in [9]                                                                                      |              |                                                                                 |

<sup>a</sup> Glucose, xylose, arabinose, mannose, galactose, lignin, and acetate

<sup>b</sup> Ratio of C split: 95% to alcohol formation, 5% to cell biomass production

<sup>c</sup> As both five- and six-carbon sugars are converted in the fermentation operation, the reactions for xylose and arabinose can also be derived from the equation by multiplying all non-sugar compounds by a factor of 5/6

AOR: Athermic Oxygen Removal; BDO: 1,4-butanediol; CBP: Consolidated Bioprocessing; CELF: Co-solvent Enhanced Lignocellulosic Fractionation; DCW: dry cell weight; IBA: isobutyl acetate; LLE: liquid-liquid extraction; THF: tetrahydrofuran; WHSV: weight hour space velocity

## Carbon recovery efficiency

Carbon recovery efficiency is calculated through the ratio between the carbon flow in carbon-based products synthesized in the biorefinery and the carbon flow of biobased inputs to the facility, as shown in Equation S1. Natural gas and methanol are not accounted for in the calculations in view of their use as energy carriers: while natural gas is used in the Cogeneration of Heat and Power (CHP) section of the biorefineries for energetic purposes, methanol is employed in the Athermic Oxygen Removal (AOR) of lignin both as a solvent and to generate hydrogen for the cleavage of lignin bonds into cycloalkanes.

$$\%Carbon\ recovery = \frac{Carbon\ flow\ products\ \left(\frac{kg}{h}\right)}{Carbon\ flow\ biobased\ inputs\ \left(\frac{kg}{h}\right)} \quad (S1)$$

Table S3. Inputs and outputs considered for the calculation of the carbon recovery efficiency

| <b>Products</b>  | <b>Carbon content (kg C/kg compound)</b> |
|------------------|------------------------------------------|
| Ethanol          | 53.3%                                    |
| Isobutanol       | 64.9%                                    |
| Isobutyl acetate | 62.1%                                    |
| Adipic acid      | 49.3%                                    |
| Cycloalkanes     | 85.7%                                    |

| <b>Biobased inputs</b>            | <b>Carbon content (kg C/kg compound)</b> |
|-----------------------------------|------------------------------------------|
| Poplar <sup>a</sup>               | 48.1%                                    |
| Corn stover <sup>a</sup>          | 46.7%                                    |
| 1,4-butanediol (BDO) <sup>b</sup> | 53.3%                                    |
| Glucose                           | 40.0%                                    |

<sup>a</sup> Calculated on dry basis.

<sup>b</sup> Originated from THF decomposition during CELF pretreatment of biomass. BDO is converted to muconic acid during aerobic fermentation to yield adipic acid after upgrading.

## Economic parameters

Table S4. Main financial assumptions used in the techno-economic assessment (TEA), based on an n<sup>th</sup>-plant design basis.

| <b>Financial assumption</b>           | <b>Value</b>                   |
|---------------------------------------|--------------------------------|
| Plant life                            | 30 years                       |
| Cost year dollar                      | 2016\$                         |
| Capacity Factor                       | 90%                            |
| Discount rate                         | 10%                            |
| General plant depreciation            | MACR                           |
| General plant recovery period         | 7 years                        |
| Steam plant depreciation              | MACR                           |
| Steam plant recovery period           | 20 years                       |
| Federal tax rate                      | 21%                            |
| Financing                             | 40% equity                     |
| Loan terms                            | 10-year loan at 8% APR         |
| Construction period                   | 3 years                        |
| <i>First 12 months' expenditures</i>  | 8%                             |
| <i>Next 12 months' expenditures</i>   | 60%                            |
| <i>Last 12 months' expenditures</i>   | 32%                            |
| Working capital                       | 5% of fixed capital investment |
| Start-up time                         | 6 months                       |
| <i>Revenues during start-up</i>       | 50%                            |
| <i>Variable costs during start-up</i> | 75%                            |

APR: annual percentage rate; MACR: modified accelerated cost recovery

Table S5. Detailed technical indicators of all assessed scenarios.

| <b>Feedstock</b>                                    | <b>Poplar</b>       |                   |                     |                   | <b>Stover</b>       |                   |                     |                   |
|-----------------------------------------------------|---------------------|-------------------|---------------------|-------------------|---------------------|-------------------|---------------------|-------------------|
| <b>CBP alcohol</b>                                  | <b>Ethanol</b>      |                   | <b>Isobutanol</b>   |                   | <b>Ethanol</b>      |                   | <b>Isobutanol</b>   |                   |
| <b>Lignin fate</b>                                  | <b>Cycloalkanes</b> | <b>Combustion</b> | <b>Cycloalkanes</b> | <b>Combustion</b> | <b>Cycloalkanes</b> | <b>Combustion</b> | <b>Cycloalkanes</b> | <b>Combustion</b> |
| <b>Products</b>                                     |                     |                   |                     |                   |                     |                   |                     |                   |
| <i>Ethanol (million gal/yr)</i>                     | 51.9                | 51.9              | -                   | -                 | 37.8                | 37.8              | -                   | -                 |
| <i>Isobutanol (million gal/yr)</i>                  | -                   | -                 | 36.3                | 36.3              | -                   | -                 | 29.1                | 29.1              |
| <i>Cycloalkanes (million gal/yr)</i>                | 18.2                | -                 | 18.2                | -                 | 11.0                | -                 | 11.0                | -                 |
| <i>Isobutyl acetate (thousand t/yr)</i>             | 41.4                | 41.4              | 41.4                | 41.4              | 53.6                | 53.6              | 53.6                | 53.6              |
| <i>Adipic acid (thousand t/yr)</i>                  | 36.7                | 36.7              | 36.7                | 36.7              | 39.9                | 39.9              | 39.9                | 39.9              |
| <i>Na<sub>2</sub>SO<sub>4</sub> (thousand t/yr)</i> | 37.5                | 38.5              | 38.0                | 39.0              | 39.9                | 41.3              | 42.0                | 43.2              |
| <i>Surplus electricity (GWh/yr)</i>                 | 0                   | 0                 | 34.6                | 0                 | 0                   | 0                 | 0                   | 0                 |
| Fuel yield (GGE/dry ton feedstock)                  | 75.9                | 46.7              | 70.1                | 40.8              | 51.8                | 34.2              | 49.7                | 32.1              |
| <i>Ethanol</i>                                      | 46.7                | 46.7              | -                   | -                 | 34.2                | 34.2              | -                   | -                 |
| <i>Isobutanol</i>                                   | -                   | -                 | 40.8                | 40.8              | -                   | -                 | 32.1                | 32.1              |
| <i>Cycloalkanes</i>                                 | 29.3                | -                 | 29.3                | -                 | 17.7                | -                 | 17.6                | -                 |
| Natural gas input (MMBTU/h)                         | 574.0               | 0                 | 1011.0              | 431.8             | 389.7               | 0                 | 842.5               | 531.8             |
| Electricity imports (GWh/yr)                        | 81.4                | 112.7             | 0                   | 6.5               | 96.4                | 101.2             | 3.9                 | 19.8              |

GGE: gallon of gasoline equivalent; MMBTU: million British thermal unit



Table S6. Detailed economic indicators of all assessed scenarios.

| Feedstock                                           | Poplar       |              |              |              | Stover       |              |              |              |
|-----------------------------------------------------|--------------|--------------|--------------|--------------|--------------|--------------|--------------|--------------|
|                                                     | Ethanol      |              | Isobutanol   |              | Ethanol      |              | Isobutanol   |              |
| CBP alcohol                                         |              |              |              |              |              |              |              |              |
| Lignin fate                                         | Cycloalkanes | Combustion   | Cycloalkanes | Combustion   | Cycloalkanes | Combustion   | Cycloalkanes | Combustion   |
| CAPEX (MM\$)                                        |              |              |              |              |              |              |              |              |
| <i>Total Installed Costs <sup>a</sup></i>           |              |              |              |              |              |              |              |              |
| <i>Biomass pretreatment (CELF)</i>                  | 45.5         | 45.5         | 45.5         | 45.5         | 58.5         | 58.5         | 58.5         | 58.5         |
| <i>Alcohol production</i>                           | 39.0         | 39.0         | 49.3         | 49.3         | 29.8         | 29.8         | 48.2         | 48.2         |
| <i>Isobutyl acetate production</i>                  | 78.9         | 78.9         | 78.9         | 78.9         | 94.5         | 94.5         | 94.5         | 94.5         |
| <i>Cycloalkanes production</i>                      | 88.3         | -            | 88.3         | -            | 62.5         | -            | 62.5         | -            |
| <i>Adipic acid production</i>                       | 72.4         | 72.4         | 72.4         | 72.4         | 78.1         | 78.1         | 78.1         | 78.1         |
| <i>Wastewater treatment</i>                         | 59.6         | 56.6         | 68.1         | 65.0         | 53.7         | 49.8         | 69.3         | 65.5         |
| <i>Cogeneration of heat and power</i>               | 74.5         | 61.7         | 95.6         | 83.9         | 67.5         | 57.1         | 88.7         | 82.8         |
| <i>Utilities and storage</i>                        | 14.9         | 13.5         | 16.8         | 15.0         | 14.6         | 13.7         | 16.4         | 15.3         |
| <i>Other Direct Costs</i>                           | 56.7         | 41.4         | 58.5         | 42.9         | 56.6         | 45.7         | 59.8         | 48.8         |
| <i>Indirect Costs</i>                               | 317.9        | 245.7        | 344.0        | 271.6        | 309.5        | 256.7        | 345.6        | 295.2        |
| <b>Fixed Capital Investment (FCI)</b>               | <b>847.7</b> | <b>655.2</b> | <b>917.5</b> | <b>724.2</b> | <b>825.3</b> | <b>684.5</b> | <b>921.6</b> | <b>787.2</b> |
| IRR (%)                                             | 10.0%        | 10.1%        | 6.6%         | 5.8%         | 7.1%         | 7.6%         | 4.3%         | 3.7%         |
| Alcohol MFSP (\$/GGE) <sup>b</sup>                  | 2.99         | 2.97         | 3.92         | 3.90         | 3.84         | 3.59         | 4.95         | 4.85         |
| RIN credit to reach viability (\$/gal) <sup>c</sup> | -            | -            | 0.35         | 0.59         | 0.37         | 0.40         | 0.83         | 1.20         |
| Carbon recovery efficiency (%)                      | 52.5%        | 37.1%        | 49.3%        | 33.9%        | 46.2%        | 36.2%        | 44.9%        | 34.9%        |

<sup>a</sup> Feedstock processing and handling aspects are outside the scope of this work and are rolled into delivered feedstock costs at the throat of the biomass pretreatment section.

<sup>b</sup> Calculated without RIN credits.

<sup>c</sup> Combined gallons of alcohol (ethanol or isobutanol) and cycloalkanes (when lignin is converted in AOR).

Table S7. Detailed capital expenditures (CAPEX) of the scenario processing poplar to ethanol and producing cycloalkanes from lignin.

| CELF PRETREATMENT                          | Equipment Costs |              |               |                       |             |             |                        |
|--------------------------------------------|-----------------|--------------|---------------|-----------------------|-------------|-------------|------------------------|
| EQUIPMENT TITLE                            | NUM REQ         | \$           | Year of Quote | Purch Cost in Base Yr | Scaling Exp | Inst Factor | Inst Cost in Proj year |
| <b>CELF reactor</b>                        |                 |              |               |                       |             |             |                        |
| Pretreatment Reactor                       | 1               | \$150,000    | 2013          | \$150,000             | 1.00        | 2.5         | \$21,484,664           |
| Sulfuric Acid Pump                         | 1               | \$8,000      | 2009          | \$8,000               | 0.80        | 2.3         | \$8,013                |
| Hydrolyzate Solid-Liquid Separator         | 1               | \$35,000,000 | 2009          | \$10,500,000          | 0.70        | 1.7         | \$19,382,094           |
| Oligomer Conversion Tank (reacidification) | 1               | \$203,000    | 2009          | \$203,000             | 0.70        | 2.0         | \$422,382              |
| <b>Evaporator</b>                          |                 |              |               |                       |             |             |                        |
| Evaporator Feed Tank                       | 1               | \$45,966     | 2011          | \$45,966              | 0.60        | 2.5         | \$39,389               |
| Evaporator Feed Heater                     | 1               | \$274,818    | 2011          | \$274,818             | 0.60        | 3.0         | \$161,468              |
| Evaporator Flash Drum                      | 1               | \$511,000    | 2009          | \$511,000             | 0.70        | 2.0         | \$356,520              |
| <b>Solvent Recovery Column</b>             |                 |              |               |                       |             |             |                        |
| THF Recovery Column Tower                  | 1               | \$1,387,516  | 2007          | \$1,387,516           | 0.60        | 1.1         | \$2,706,157            |
| THF Recovery Column Reboiler               | 1               | \$92,000     | 2010          | \$92,000              | 0.70        | 2.2         | \$196,068              |
| THF Recovery Column Condenser              | 1               | \$85,000     | 2010          | \$85,000              | 0.70        | 2.2         | \$333,995              |
| <b>Tanks</b>                               |                 |              |               |                       |             |             |                        |
| THF storage tank                           | 1               | \$670,000    | 2009          | \$670,000             | 0.70        | 1.7         | \$309,844              |
| Sulfuric Acid Storage Tank                 | 1               | \$96,000     | 2010          | \$96,000              | 0.70        | 1.5         | \$102,952              |
| <b>Area totals</b>                         |                 |              |               |                       |             |             | <b>\$45,503,547</b>    |

Table S7 (continued)

| CONVERSION & UPGRADING                  | Equipment Costs |             |               |                       |             |             |                        |
|-----------------------------------------|-----------------|-------------|---------------|-----------------------|-------------|-------------|------------------------|
| EQUIPMENT TITLE                         | NUM REQ         | \$          | Year of Quote | Purch Cost in Base Yr | Scaling Exp | Inst Factor | Inst Cost in Proj year |
| <b>CBP to Ethanol</b>                   |                 |             |               |                       |             |             |                        |
| <b>Consolidated Bioprocessing (CBP)</b> |                 |             |               |                       |             |             |                        |
| Fermenter Preheater                     | 1               | \$23,900    | 2009          | \$23,900              | 0.70        | 1.8         | \$25,126               |
| Ethanol Fermenter                       | 1               | \$844,000   | 2009          | \$844,000             | 1.00        | 1.5         | \$18,396,418           |
| Ethanol Fermenter Agitator              | 1               | \$52,500    | 2009          | \$52,500              | 1.00        | 1.5         | \$1,144,327            |
| Fermenter Batch Cooler                  | 1               | \$23,900    | 2009          | \$23,900              | 0.70        | 1.8         | \$43,811               |
| Milling Equipment - Disc Refiner        | 8               | \$2,466,700 | 2013          | \$2,466,700           | 0.60        | 1.5         | \$2,788,948            |
| Beer Transfer Pump                      | 1               | \$26,800    | 2009          | \$26,800              | 0.80        | 2.3         | \$47,938               |
| Beer Storage Tank                       | 1               | \$636,000   | 2009          | \$636,000             | 0.70        | 1.8         | \$1,016,389            |
| Beer Surge Tank Agitator                | 2               | \$68,300    | 2009          | \$68,300              | 0.50        | 1.5         | \$95,110               |
| <b>Seed Fermentation</b>                |                 |             |               |                       |             |             |                        |
| 1st Seed Fermenter                      | 2               | \$75,400    | 2009          | \$75,400              | 0.70        | 1.8         | \$140,869              |
| 2nd Seed Fermenter                      | 2               | \$116,600   | 2009          | \$116,600             | 0.70        | 1.8         | \$217,842              |
| 3rd Seed Fermenter                      | 2               | \$157,600   | 2009          | \$157,600             | 0.70        | 1.8         | \$294,442              |
| 4th Seed Fermenter                      | 2               | \$352,000   | 2009          | \$352,000             | 0.70        | 2.0         | \$730,709              |
| 4th Seed Fermenter Coil                 | 1               | INCLUDED    |               |                       |             |             |                        |
| 4th Seed Vessel Agitator                | 2               | \$26,000    | 2009          | \$26,000              | 0.50        | 1.5         | \$40,480               |
| 5th Seed Fermenter                      | 2               | \$1,180,000 | 2009          | \$1,180,000           | 0.70        | 2.0         | \$2,449,534            |
| 5th Seed Fermenter Coil                 | 1               | INCLUDED    |               |                       |             |             |                        |
| 5th Seed Vessel Agitator                | 2               | \$43,000    | 2009          | \$43,000              | 0.50        | 1.5         | \$66,947               |
| Seed Transfer Pump                      | 2               | \$24,300    | 2009          | \$24,300              | 0.80        | 2.3         | \$39,892               |
| Seed Hold Tank                          | 1               | \$439,000   | 2009          | \$439,000             | 0.70        | 1.8         | \$618,766              |
| Seed Hold Tank Agitator                 | 1               | \$31,800    | 2009          | \$31,800              | 0.50        | 1.5         | \$40,483               |
| Seed Hold Transfer Pump                 | 1               | \$8,200     | 2009          | \$8,200               | 0.80        | 2.3         | \$13,462               |
| <b>Ethanol Recovery</b>                 |                 |             |               |                       |             |             |                        |
| Preheater                               | 1               | \$274,818   | 2011          | \$274,818             | 0.60        | 3.0         | \$1,078,429            |
| 1st Column Condenser                    | 1               | \$9,900     | 2016          | \$9,900               | 0.44        | 2.5         | \$28,423               |
| 1st Column Condenser Acc                | 1               | \$12,900    | 2016          | \$12,900              | 0.44        | 2.5         | \$37,037               |
| 1st Column Reboiler                     | 1               | \$120,700   | 2016          | \$120,700             | 0.79        | 2.5         | \$384,812              |
| 1st Column Reflux Pump                  | 1               | \$4,600     | 2016          | \$4,600               | 0.79        | 2.5         | \$16,013               |
| 1st Column Tower                        | 1               | \$222,500   | 2016          | \$222,500             | 0.68        | 2.5         | \$721,188              |
| 2nd Column Condenser                    | 1               | \$60,900    | 2016          | \$60,900              | 0.44        | 2.5         | \$181,579              |
| 2nd Column Condenser Acc                | 1               | \$16,300    | 2016          | \$16,300              | 0.44        | 2.5         | \$48,600               |
| 2nd Column Reboiler                     | 1               | \$24,900    | 2016          | \$24,900              | 0.79        | 2.5         | \$76,272               |
| 2nd Column Reflux Pump                  | 1               | \$6,700     | 2016          | \$6,700               | 0.79        | 2.5         | \$22,588               |
| 2nd Column Tower                        | 1               | \$358,500   | 2016          | \$358,500             | 0.68        | 2.5         | \$1,029,883            |
| Molecular Sieve Package (9 pieces)      | 1               | \$2,601,000 | 2009          | \$2,601,000           | 0.60        | 1.8         | \$4,442,496            |
| Pump                                    | 1               | \$26,800    | 2009          | \$26,800              | 0.80        | 2.3         | \$90,563               |
| Vent Scrubber                           | 1               | \$215,000   | 2009          | \$215,000             | 0.60        | 2.4         | \$493,151              |
| <b>Solids Removal</b>                   |                 |             |               |                       |             |             |                        |
| Lignin Wet Cake Conveyor                | 1               | \$70,000    | 2009          | \$70,000              | 0.80        | 1.7         | \$30,827               |
| Lignin Wet Cake Screw                   | 1               | \$20,000    | 2009          | \$20,000              | 0.80        | 1.7         | \$8,808                |
| Pressure Filter Pressing Compr          | 1               | \$75,200    | 2009          | \$75,200              | 0.60        | 1.6         | \$104,266              |
| Pressure Filter Drying Compr            | 2               | \$405,000   | 2009          | \$405,000             | 0.60        | 1.6         | \$557,672              |
| Filtrate Tank Discharge Pump            | 1               | \$13,040    | 2010          | \$13,040              | 0.80        | 2.3         | \$6,766                |
| Feed Pump                               | 1               | \$18,173    | 2010          | \$18,173              | 0.80        | 2.3         | \$9,430                |
| Manifold Flush Pump                     | 1               | \$17,057    | 2010          | \$17,057              | 0.80        | 2.3         | \$8,850                |
| Cloth Wash Pump                         | 1               | \$29,154    | 2010          | \$29,154              | 0.80        | 2.3         | \$15,127               |
| Filtrate Discharge Pump                 | 1               | \$13,040    | 2010          | \$13,040              | 0.80        | 2.3         | \$6,766                |
| Pressure Filter                         | 2               | \$3,294,700 | 2010          | \$3,294,700           | 0.80        | 1.7         | \$1,263,572            |
| Filtrate Tank                           | 1               | \$103,000   | 2010          | \$103,000             | 0.70        | 2.0         | \$55,864               |
| Feed Tank                               | 1               | \$174,800   | 2010          | \$174,800             | 0.70        | 2.0         | \$94,806               |
| Recycled Water Tank                     | 1               | \$1,520     | 2010          | \$1,520               | 0.70        | 3.0         | \$1,237                |
| Pressing Air Compressor Receiver        | 1               | \$8,000     | 2010          | \$8,000               | 0.70        | 3.1         | \$6,725                |
| Drying Air Compressor Receiver          | 2               | \$17,000    | 2010          | \$17,000              | 0.70        | 3.1         | \$14,291               |
| <b>Area totals</b>                      |                 |             |               |                       |             |             | <b>\$39,047,536</b>    |

Table S7 (continued)

| CONVERSION & UPGRADING                            |         | Equipment Costs |               |                       |             |             |                        |
|---------------------------------------------------|---------|-----------------|---------------|-----------------------|-------------|-------------|------------------------|
| EQUIPMENT TITLE                                   | NUM REQ | \$              | Year of Quote | Purch Cost in Base Yr | Scaling Exp | Inst Factor | Inst Cost in Proj year |
| <b>Fed-batch Fermentation to Isobutyl Acetate</b> |         |                 |               |                       |             |             |                        |
| Sugar Concentration                               | 1       | \$6,370,000     | 2013          | \$6,370,000           | 0.70        | 2.0         | \$10,208,077           |
| Concentrated Sugar Storage Tank                   | 1       | \$168,000       | 2011          | \$168,000             | 0.70        | 1.8         | \$383,934              |
| 1st Seed Fermenter                                | 1       | \$37,700        | 2009          | \$37,700              | 0.70        | 1.8         | \$114,421              |
| 2nd Seed Fermenter                                | 1       | \$58,300        | 2009          | \$58,300              | 0.70        | 1.8         | \$176,943              |
| 3rd Seed Fermenter                                | 1       | \$78,800        | 2009          | \$78,800              | 0.70        | 1.8         | \$239,161              |
| 4th Seed Fermenter                                | 1       | \$176,000       | 2009          | \$176,000             | 0.70        | 2.0         | \$593,520              |
| 4th Seed Vessel Agitator                          | 1       | \$13,000        | 2009          | \$13,000              | 0.50        | 1.5         | \$28,623               |
| Isobutyl Acetate Production Fermenter             | 1       | \$590,000       | 2009          | \$590,000             | 0.70        | 2.0         | \$6,973,976            |
| Isobutyl Acetate Production Fermenter Agitator    | 1       | \$21,500        | 2009          | \$21,500              | 0.50        | 1.5         | \$115,956              |
| Seed Transfer Pump                                | 1       | \$12,150        | 2009          | \$12,150              | 0.80        | 2.3         | \$10,173               |
| Seed Hold Tank                                    | 1       | \$439,000       | 2009          | \$439,000             | 0.70        | 1.8         | \$343,307              |
| Seed Hold Tank Agitator                           | 1       | \$31,800        | 2009          | \$31,800              | 0.50        | 1.5         | \$26,578               |
| Seed Hold Transfer Pump                           | 1       | \$8,200         | 2009          | \$8,200               | 0.80        | 2.3         | \$6,866                |
| Beer Storage Tank                                 | 1       | \$636,000       | 2009          | \$636,000             | 0.70        | 1.8         | \$54,763               |
| Beer Surge Tank Agitator                          | 1       | \$44,150        | 2009          | \$44,150              | 0.50        | 1.5         | \$7,632                |
| Beer Transfer Pump                                | 1       | \$26,800        | 2009          | \$26,800              | 0.80        | 2.3         | \$1,702                |
| Ultrafiltration Membrane Separator                | 1       | \$2,048,000     | 2011          | \$2,048,000           | 1.00        | 2.5         | \$56,824,395           |
| Isobutyl Acetate Recovery Column Tower            | 1       | \$286,000       | 2015          | \$286,000             | 1.00        | 3.3         | \$208,937              |
| Isobutyl Acetate Recovery Column Condenser        | 1       | \$16,400        | 2015          | \$16,400              | 1.00        | 4.8         | \$8,300                |
| Isobutyl Acetate Recovery Column Condenser Acc    | 1       | \$32,600        | 2015          | \$32,600              | 1.00        | 5.1         | \$17,535               |
| Isobutyl Acetate Recovery Column Reboiler         | 1       | \$318,800       | 2015          | \$318,800             | 1.00        | 2.3         | \$63,169               |
| Isobutyl Acetate Recovery Column Reflux pump      | 1       | \$13,100        | 2015          | \$13,100              | 1.00        | 5.5         | \$7,610                |
| Centrifuge For Cell Removal                       | 1       | \$327,680       | 2011          | \$327,680             | 0.60        | 2.3         | \$2,452,971            |
| <b>Area totals</b>                                |         |                 |               |                       |             |             | <b>\$78,868,551</b>    |

| CONVERSION & UPGRADING                        |         | Equipment Costs |               |                       |             |             |                        |
|-----------------------------------------------|---------|-----------------|---------------|-----------------------|-------------|-------------|------------------------|
| EQUIPMENT TITLE                               | NUM REQ | \$              | Year of Quote | Purch Cost in Base Yr | Scaling Exp | Inst Factor | Inst Cost in Proj year |
| <b>AOR to Cycloalkanes (Jet Fuel)</b>         |         |                 |               |                       |             |             |                        |
| <b>Lignin Preparation</b>                     |         |                 |               |                       |             |             |                        |
| Lignin Wet Cake Conveyor                      | 1       | \$70,000        | 2009          | \$70,000              | 0.80        | 1.7         | \$88,374               |
| Lignin Wet Cake Screw                         | 1       | \$20,000        | 2009          | \$20,000              | 0.80        | 1.7         | \$25,250               |
| Pressure Filter Pressing Compr                | 1       | \$75,200        | 2009          | \$75,200              | 0.60        | 1.6         | \$26,277               |
| Pressure Filter Drying Compr                  | 2       | \$405,000       | 2009          | \$405,000             | 0.60        | 1.6         | \$140,542              |
| Filtrate Tank Discharge Pump                  | 1       | \$13,040        | 2010          | \$13,040              | 0.80        | 2.3         | \$19,397               |
| Feed Pump                                     | 1       | \$18,173        | 2010          | \$18,173              | 0.80        | 2.3         | \$27,032               |
| Manifold Flush Pump                           | 1       | \$17,057        | 2010          | \$17,057              | 0.80        | 2.3         | \$25,372               |
| Cloth Wash Pump                               | 1       | \$29,154        | 2010          | \$29,154              | 0.80        | 2.3         | \$43,366               |
| Filtrate Discharge Pump                       | 1       | \$13,040        | 2010          | \$13,040              | 0.80        | 2.3         | \$19,397               |
| Pressure Filter                               | 2       | \$3,294,700     | 2010          | \$3,294,700           | 0.80        | 1.7         | \$3,622,341            |
| Filtrate Tank                                 | 1       | \$103,000       | 2010          | \$103,000             | 0.70        | 2.0         | \$140,393              |
| Feed Tank                                     | 1       | \$174,800       | 2010          | \$174,800             | 0.70        | 2.0         | \$238,260              |
| Recycled Water Tank                           | 1       | \$1,520         | 2010          | \$1,520               | 0.70        | 3.0         | \$3,108                |
| Pressing Air Compressor Receiver              | 1       | \$8,000         | 2010          | \$8,000               | 0.70        | 3.1         | \$16,902               |
| Drying Air Compressor Receiver                | 2       | \$17,000        | 2010          | \$17,000              | 0.70        | 3.1         | \$35,916               |
| Milling Equipment - Disc Refiner              | 8       | \$2,466,700     | 2013          | \$2,466,700           | 0.60        | 1.5         | \$1,364,334            |
| <b>Continuous Supercritical Reactor (AOR)</b> |         |                 |               |                       |             |             |                        |
| AOR Feed Tank                                 | 1       | \$45,966        | 2011          | \$45,966              | 0.60        | 2.5         | \$62,857               |
| AOR Reactor Pump                              | 1       | \$802,861       | 2014          | \$802,861             | 0.80        | 1.4         | \$684,340              |
| AOR Fixed Bed Reactor                         | 1       | \$6,513,387     | 2011          | \$6,513,387           | 0.70        | 2.0         | \$77,020,110           |
| Methanol Recovery Column Condenser            | 1       | \$152,200       | 2016          | \$152,200             | 0.44        | 2.5         | \$229,183              |
| Methanol Recovery Column Condenser Acc        | 1       | \$14,500        | 2016          | \$14,500              | 0.44        | 2.5         | \$21,834               |
| Methanol Recovery Column Reboiler             | 1       | \$77,800        | 2016          | \$77,800              | 0.79        | 2.5         | \$107,725              |
| Methanol Recovery Column Reflux Pump          | 1       | \$5,900         | 2016          | \$5,900               | 0.79        | 2.5         | \$9,187                |
| Methanol Recovery Column Tower                | 1       | \$408,700       | 2016          | \$408,700             | 0.68        | 2.5         | \$1,267,894            |
| Cycloalkane Recovery Column Condenser         | 1       | \$91,300        | 2016          | \$91,300              | 0.44        | 2.5         | \$240,187              |
| Cycloalkane Recovery Column Condenser Acc     | 1       | \$22,800        | 2016          | \$22,800              | 0.44        | 2.5         | \$59,981               |
| Cycloalkane Recovery Column Reboiler          | 1       | \$200,400       | 2016          | \$200,400             | 0.79        | 2.5         | \$541,356              |
| Cycloalkane Recovery Column Reflux Pump       | 1       | \$9,200         | 2016          | \$9,200               | 0.79        | 2.5         | \$150,827              |
| Cycloalkane Recovery Column Tower             | 1       | \$1,107,300     | 2016          | \$1,107,300           | 0.68        | 2.5         | \$2,027,444            |
| <b>Area totals</b>                            |         |                 |               |                       |             |             | <b>\$88,259,187</b>    |

Table S7 (continued)

| CONVERSION & UPGRADING                           | Equipment Costs |             |               |                       |             |             |                        |
|--------------------------------------------------|-----------------|-------------|---------------|-----------------------|-------------|-------------|------------------------|
| EQUIPMENT TITLE                                  | NUM REQ         | \$          | Year of Quote | Purch Cost in Base Yr | Scaling Exp | Inst Factor | Inst Cost in Proj year |
| <b>Fermentation and Upgrading to Adipic Acid</b> |                 |             |               |                       |             |             |                        |
| <b>Muconate Fermentation</b>                     |                 |             |               |                       |             |             |                        |
| Sugar Concentration                              | 1               | \$6,370,000 | 2013          | \$6,370,000           | 0.70        | 2.0         | \$6,326,540            |
| Concentrated Sugar Storage Tank                  | 1               | \$168,000   | 2011          | \$168,000             | 0.70        | 1.8         | \$241,135              |
| 1st Aerobic Seed                                 | 1               | \$46,000    | 2009          | \$46,000              | 1.00        | 1.80        | \$257,824              |
| 1st Seed Vessel Agitator                         | 1               | \$3,420     | 2009          | \$3,420               | 1.00        | 1.50        | \$15,974               |
| 2nd Aerobic Seed                                 | 1               | \$57,500    | 2009          | \$57,500              | 1.00        | 1.80        | \$322,280              |
| 2nd Seed Vessel Agitator                         | 1               | \$11,000    | 2009          | \$11,000              | 1.00        | 1.50        | \$51,378               |
| Bubble Column Seed Fermenter                     | 1               | \$274,100   | 2014          | \$274,100             | 1.00        | 2.30        | \$1,778,358            |
| Seed Circulation Cooler                          | 1               | \$8,400     | 2014          | \$8,400               | 1.00        | 2.20        | \$52,130               |
| Bubble Column Production Fermenter               | 1               | \$1,691,400 | 2014          | \$1,691,400           | 1.00        | 2.30        | \$29,263,422           |
| Production Circulation Cooler                    | 1               | \$48,100    | 2014          | \$48,100              | 1.00        | 2.20        | \$796,010              |
| Production Circulation Pump                      | 1               | \$11,500    | 2014          | \$11,500              | 1.00        | 2.30        | \$198,965              |
| Fermentation Air Compressor                      | 1               | \$1,318,600 | 2014          | \$1,318,600           | 1.00        | 1.60        | \$965,802              |
| Fermentation Air Receiver                        | 1               | \$104,600   | 2014          | \$104,600             | 1.00        | 2.00        | \$95,767               |
| Fermentation Surge Tank                          | 1               | \$45,966    | 2011          | \$45,966              | 0.60        | 2.50        | \$43,900               |
| Ultrafiltration Membrane Separator               | 1               | \$2,048,000 | 2011          | \$2,048,000           | 0.60        | 2.50        | \$4,735,366            |
| <b>Recovery and Upgrading to Adipic Acid</b>     |                 |             |               |                       |             |             |                        |
| Carbon Filter                                    | 1               | \$345,234   | 2011          | \$345,234             | 0.60        | 2.50        | \$798,247              |
| CCM Crystallizer                                 | 2 (series)      | \$7,104,192 | 2011          | \$7,104,192           | 0.60        | 2.50        | \$3,977,613            |
| CCM Centrifuge                                   | 1               | \$327,680   | 2011          | \$327,680             | 0.60        | 2.30        | \$377,432              |
| CCM Drier                                        | 2 (parallel)    | \$555,008   | 2011          | \$555,008             | 0.60        | 2.60        | \$767,457              |
| Dissolution Tank                                 | 1               | \$1,317,325 | 2011          | \$1,317,325           | 0.70        | 1.80        | \$337,228              |
| Dissolution Tank agitator                        | 1               | \$63,000    | 2009          | \$63,000              | 1.00        | 1.50        | \$98,085               |
| Filtration Centrifuge (Salt Removal)             | 1               | \$327,680   | 2011          | \$327,680             | 0.60        | 2.30        | \$27,874               |
| HDO Feed Tank                                    | 1               | \$45,966    | 2011          | \$45,966              | 0.60        | 2.50        | \$22,951               |
| HDO Reactor Pump                                 | 1               | \$802,861   | 2014          | \$802,861             | 0.80        | 1.40        | \$178,595              |
| HDO Feed Effluent Economizer                     | 1               | \$353,600   | 2011          | \$353,600             | 0.70        | 2.66        | \$144,121              |
| HDO Fixed Bed Reactor                            | 1               | \$6,513,387 | 2011          | \$6,513,387           | 0.70        | 2.00        | \$10,818,487           |
| Hydrogenation Intercooler (Bed 1)                | 1               | \$2,353,181 | 2007          | \$2,353,181           | 0.65        | 2.21        | \$480,336              |
| Hydrogenation Intercooler (Bed 2)                | 1               | \$2,353,181 | 2007          | \$2,353,181           | 0.65        | 2.21        | \$659,401              |
| H2 Makeup Compressor                             | 1               | \$1,621,200 | 2011          | \$1,621,200           | 0.60        | 1.09        | \$1,185,438            |
| H2 Makeup Compressor (Spare)                     | 1               | \$1,621,200 | 2011          | \$1,621,200           | 0.60        | 1.08        | \$1,176,045            |
| HHPS                                             | 1               | \$436,000   | 2013          | \$436,000             | 1.00        | 1.50        | \$119,027              |
| HDO Hot Gas Cooler                               | 1               | \$321,600   | 2011          | \$321,600             | 0.70        | 1.66        | \$17,178               |
| CHPS                                             | 1               | \$328,500   | 2011          | \$328,500             | 0.70        | 2.59        | \$11,843               |
| AA Evaporator Feed Tank                          | 1               | \$45,966    | 2011          | \$45,966              | 0.60        | 2.50        | \$32,322               |
| AA Evaporator Feed Heater                        | 1               | \$274,818   | 2011          | \$274,818             | 0.60        | 3.00        | \$128,568              |
| AA Evaporator Flash Drum                         | 1               | \$511,000   | 2009          | \$511,000             | 0.70        | 2.00        | \$283,070              |
| AA Condenser Drum                                | 1               | \$487,000   | 2010          | \$487,000             | 0.60        | 2.80        | \$447,069              |
| AA Crystallizer                                  | 2 (series)      | \$7,104,192 | 2011          | \$7,104,192           | 0.60        | 2.50        | \$4,042,752            |
| AA Centrifuge Separator                          | 1               | \$327,680   | 2011          | \$327,680             | 0.60        | 2.30        | \$380,919              |
| AA Drier                                         | 2 (parallel)    | \$555,008   | 2011          | \$555,008             | 0.60        | 2.60        | \$775,462              |
| <b>Area totals</b>                               |                 |             |               |                       |             |             | <b>\$72,432,373</b>    |

Table S7 (continued)

| WASTEWATER TREATMENT                    | Equipment Costs |              |               |                       |             |             |                        |
|-----------------------------------------|-----------------|--------------|---------------|-----------------------|-------------|-------------|------------------------|
| EQUIPMENT TITLE                         | NUM REQ         | \$           | Year of Quote | Purch Cost in Base Yr | Scaling Exp | Inst Factor | Inst Cost in Proj year |
| <b>Anaerobic Digestion (AD) System</b>  |                 |              |               |                       |             |             |                        |
| Anaerobic System                        | 4               | \$25,800,000 | 2012          | \$25,800,000          | 0.60        | 1.1         | \$20,512,669           |
| Biogas Emergency Flare                  | 4               | INCLUDED     | 2012          |                       |             |             |                        |
| Aeration Basin                          | 3               | \$4,908,054  | 2012          | \$4,908,054           | 0.60        | 2.1         | \$9,454,996            |
| Pump - Submersible, Anaerobic Feed      | 2               | INCLUDED     | 2012          |                       |             |             |                        |
| Pump - Centrifugal, Aeration Basin Feed | 4               | INCLUDED     | 2012          |                       |             |             |                        |
| Aeration Grid                           | 1               | INCLUDED     | 2012          |                       |             |             |                        |
| Caustic Feed System                     | 4               | \$20,000     | 2012          | \$20,000              | 0.60        | 3.0         | \$42,976               |
| Blowers                                 | 9               | \$2,070,000  | 2012          | \$2,070,000           | 0.60        | 2.0         | \$2,965,376            |
| Surface Aerators                        | 3               | \$150,000    | 2012          | \$150,000             | 0.60        | 2.7         | \$372,721              |
| Membrane Bioreactor                     | 1               | \$4,898,500  | 2012          | \$4,898,500           | 1.00        | 1.6         | \$7,497,959            |
| Pump, Centrifugal, MBR, RAS             | 6               | INCLUDED     | 2012          |                       |             |             |                        |
| Gravity Belt Thickeners                 | 3               | \$750,000    | 2012          | \$750,000             | 0.60        | 1.6         | \$854,157              |
| Centrifuge                              | 1               | \$686,800    | 2012          | \$686,800             | 0.60        | 2.7         | \$1,323,311            |
| Pump, Centrifugal, Centrifuge Feed      | 2               | INCLUDED     | 2012          |                       |             |             |                        |
| Pump, Submersible, Centrate             | 2               | INCLUDED     | 2012          |                       |             |             |                        |
| Dewatering Polymer Addition             | 2               | INCLUDED     | 2012          |                       |             |             |                        |
| Conveyor                                | 1               | \$7,000      | 2012          | \$7,000               | 0.60        | 2.9         | \$14,340               |
| Reverse Osmosis                         | 7               | \$2,450,000  | 2012          | \$2,450,000           | 1.00        | 1.8         | \$4,001,661            |
| Evaporator                              | 1               | \$5,000,000  | 2012          | \$5,000,000           | 0.60        | 1.6         | \$7,491,651            |
| Ammonia Addition System                 | 4               | \$195,200    | 2012          | \$195,200             | 0.60        | 1.5         | \$215,318              |
| <b>Sodium Sulfate Recovery</b>          |                 |              |               |                       |             |             |                        |
| Evaporator Feed Tank                    | 1               | \$45,966     | 2011          | \$45,966              | 0.60        | 2.5         | \$255,872              |
| Evaporator Feed Heater                  | 1               | \$274,818    | 2011          | \$274,818             | 0.60        | 3.0         | \$241,453              |
| Evaporator Flash Drum                   | 1               | \$511,000    | 2009          | \$511,000             | 0.70        | 2.0         | \$3,163,561            |
| Centrifuge                              | 1               | \$327,680    | 2011          | \$327,680             | 0.60        | 2.3         | \$422,357              |
| Dryer                                   | 1               | \$555,008    | 2011          | \$555,008             | 0.60        | 2.6         | \$785,346              |
| <b>Area totals</b>                      |                 |              |               |                       |             |             | <b>\$59,615,726</b>    |

Table S7 (continued)

| COGENERATION OF HEAT AND POWER    | Equipment Costs |              |               |                       |             |             |                        |
|-----------------------------------|-----------------|--------------|---------------|-----------------------|-------------|-------------|------------------------|
| EQUIPMENT TITLE                   | NUM REQ         | \$           | Year of Quote | Purch Cost in Base Yr | Scaling Exp | Inst Factor | Inst Cost in Proj year |
| Burner Combustion Air Preheater   | 1               | INCLUDED     |               |                       |             |             |                        |
| BFW Preheater                     | 1               | INCLUDED     |               |                       |             |             |                        |
| Pretreatment/BFW heat recovery    | 1               | \$41,000     | 2009          | \$41,000              | 0.70        | 2.2         | \$37,627               |
| Air Intake Fan                    |                 | INCLUDED     |               |                       |             |             |                        |
| Boiler                            | 1               | \$28,550,000 | 2010          | \$28,550,000          | 0.60        | 1.8         | \$58,845,939           |
| Turbine/Generator                 | 1               | \$9,500,000  | 2010          | \$9,500,000           | 0.60        | 1.8         | \$14,332,829           |
| Hot Process Water Softener System | 1               | \$78,000     | 2010          | \$78,000              | 0.60        | 1.8         | \$160,634              |
| Amine Addition Pkg.               | 1               | \$40,000     | 2010          | \$40,000              | 0.00        | 1.8         | \$70,810               |
| Ammonia Addition Pkg              | 1               | INCLUDED     |               |                       |             |             |                        |
| Phosphate Addition Pkg.           | 1               | INCLUDED     |               |                       |             |             |                        |
| Condensate Pump                   | 2               | INCLUDED     |               |                       |             |             |                        |
| Turbine Condensate Pump           | 2               | INCLUDED     |               |                       |             |             |                        |
| Deaerator Feed Pump               | 2               | INCLUDED     |               |                       |             |             |                        |
| BFW Pump                          | 5               | INCLUDED     |               |                       |             |             |                        |
| Blowdown Pump                     | 2               | INCLUDED     |               |                       |             |             |                        |
| Amine Transfer Pump               | 1               | INCLUDED     |               |                       |             |             |                        |
| Condensate Collection Tank        | 1               | INCLUDED     |               |                       |             |             |                        |
| Condensate Surge Drum             | 1               | INCLUDED     |               |                       |             |             |                        |
| Deaerator                         | 1               | \$305,000    | 2010          | \$305,000             | 0.60        | 3.0         | \$1,046,868            |
| Blowdown Flash Drum               | 1               | INCLUDED     |               |                       |             |             |                        |
| Amine Drum                        | 1               | INCLUDED     |               |                       |             |             |                        |
| <b>Area totals</b>                |                 |              |               |                       |             |             | <b>\$74,494,707</b>    |

| UTILITIES AND STORAGE          | Equipment Costs |             |               |                       |             |             |                        |
|--------------------------------|-----------------|-------------|---------------|-----------------------|-------------|-------------|------------------------|
| EQUIPMENT TITLE                | NUM REQ         | \$          | Year of Quote | Purch Cost in Base Yr | Scaling Exp | Inst Factor | Inst Cost in Proj year |
| <b>Utilities System</b>        |                 |             |               |                       |             |             |                        |
| Cooling Tower System           | 1               | \$1,375,000 | 2010          | \$1,375,000           | 0.60        | 1.5         | \$2,221,224            |
| Plant Air Compressor           | 1               | \$28,000    | 2010          | \$28,000              | 0.60        | 1.6         | \$44,060               |
| Chilled Water Package          | 1               | \$1,275,750 | 2010          | \$1,275,750           | 0.60        | 1.6         | \$2,726,071            |
| CIP System                     | 1               | \$421,000   | 2009          | \$421,000             | 0.60        | 1.8         | \$1,297,008            |
| Cooling Water Pump             | 3               | \$283,671   | 2010          | \$283,671             | 0.80        | 3.1         | \$908,382              |
| Make-up Water Pump             | 1               | \$6,864     | 2010          | \$6,864               | 0.80        | 3.1         | \$75,178               |
| Process Water Circulating Pump | 1               | \$15,292    | 2010          | \$15,292              | 0.80        | 3.1         | \$63,888               |
| Instrument Air Dryer           | 1               | \$15,000    | 2009          | \$15,000              | 0.60        | 1.8         | \$28,024               |
| Plant Air Receiver             | 1               | \$16,000    | 2009          | \$16,000              | 0.60        | 3.1         | \$51,482               |
| Process Water Tank No. 1       | 1               | \$250,000   | 2009          | \$250,000             | 0.70        | 1.7         | \$640,561              |
| <b>Storage</b>                 |                 |             |               |                       |             |             |                        |
| Ammonia Storage Tank           | 2               | \$196,000   | 2010          | \$196,000             | 0.70        | 2.0         | \$478,711              |
| CSL Storage Tank               | 1               | \$70,000    | 2009          | \$70,000              | 0.70        | 2.6         | \$20,169               |
| CSL Storage Tank Agitator      | 1               | \$21,200    | 2009          | \$21,200              | 0.50        | 1.5         | \$6,678                |
| CSL Pump                       | 1               | \$3,000     | 2009          | \$3,000               | 0.80        | 3.1         | \$749                  |
| DAP Bulk Bag Unloader          | 1               | \$30,000    | 2009          | \$30,000              | 0.60        | 1.7         | \$54,582               |
| DAP Bulk Bag Holder            | 1               | INCLUDED    |               |                       |             |             |                        |
| DAP Make-up Tank               | 1               | \$102,000   | 2009          | \$102,000             | 0.70        | 1.8         | \$39,662               |
| DAP Make-up Tank Agitator      | 1               | \$9,800     | 2009          | \$9,800               | 0.50        | 1.5         | \$15,652               |
| DAP Pump                       | 1               | \$3,000     | 2009          | \$3,000               | 0.80        | 3.1         | \$10,055               |
| Sulfuric Acid Pump             | 1               | \$7,493     | 2010          | \$7,493               | 0.80        | 2.3         | \$40,584               |
| Sulfuric Acid Storage Tank     | 1               | \$96,000    | 2010          | \$96,000              | 0.70        | 1.5         | \$304,042              |
| Caustic Storage Tank           | 1               | \$96,000    | 2011          | \$96,000              | 0.70        | 1.5         | \$201,820              |
| Firewater Storage Tank         | 1               | \$803,000   | 2009          | \$803,000             | 0.70        | 1.7         | \$1,416,890            |
| Firewater Pump                 | 1               | \$15,000    | 2009          | \$15,000              | 0.80        | 3.1         | \$48,264               |
| Ethanol Storage                | 1               | \$670,000   | 2009          | \$670,000             | 0.70        | 1.7         | \$1,730,001            |
| Isobutyl Acetate Storage       | 1               | \$670,000   | 2009          | \$670,000             | 0.70        | 1.7         | \$689,508              |
| Cycloalkane Storage            | 1               | \$670,000   | 2009          | \$670,000             | 0.70        | 1.7         | \$904,222              |
| Adipic Acid Storage            | 1               | \$690,900   | 2007          | \$690,900             | 0.65        | 1.850       | \$462,853              |
| Sodium Sulfate Storage         | 1               | \$690,900   | 2007          | \$690,900             | 0.65        | 1.850       | \$469,189              |
| <b>Area totals</b>             |                 |             |               |                       |             |             | <b>\$14,949,507</b>    |

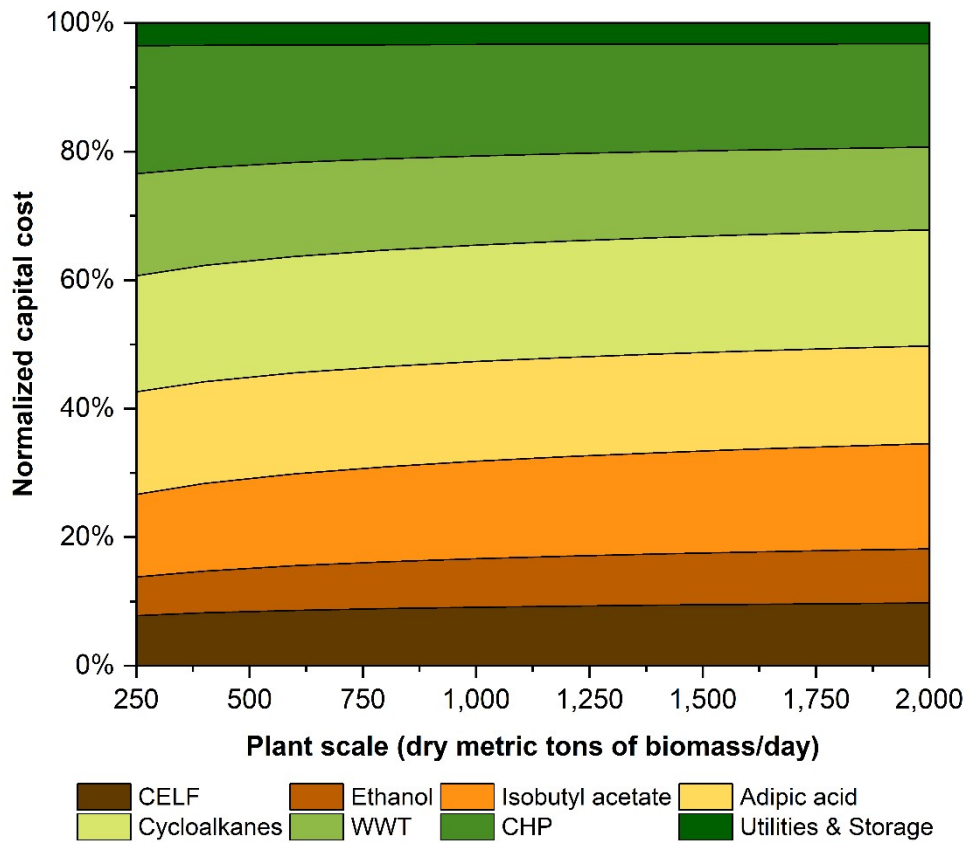

Figure S2. Breakdown of capital cost in a poplar/ethanol biorefinery with processing of lignin to cycloalkanes via AOR for different plant scales.



## LCA methodology

### Goal and Scope

The goal of this LCA is to quantify the environmental impacts of a CELF-based biorefinery and how those impacts are affected by feedstock selection, the primary alcohol product, and whether jet fuel is produced as a co-product. The scope of this LCA is farm-to-biorefinery-gate. Hereinafter, the assessed scenarios will be referred to by the numeric identification in Table S8.

Table S8. Numeric identification of scenarios for LCA discussion

| <b>Scenario</b>    | <b>1</b> | <b>2</b> | <b>3</b> | <b>4</b> | <b>5</b> | <b>6</b> | <b>7</b> | <b>8</b> |
|--------------------|----------|----------|----------|----------|----------|----------|----------|----------|
| <b>Feedstock</b>   | Poplar   | Poplar   | Stover   | Stover   | Poplar   | Poplar   | Stover   | Stover   |
| <b>Alcohol</b>     | iBuOH    | iBuOH    | iBuOH    | iBuOH    | EtOH     | EtOH     | EtOH     | EtOH     |
| <b>Lignin fate</b> | Jet      | Burn     | Jet      | Burn     | Jet      | Burn     | Jet      | Burn     |

### Allocation Methods

Allocation based on product mass and on product economic value is applied to divide total biorefinery impacts among the various co-products. In Scenario 1, the biorefinery also produces excess electricity for sale to the grid; emissions credits from this excess electricity are quantified using system expansion or displacement. The product mass-based allocation factors for the eight scenarios are given in Table S9. The product economic value-based allocation factors are given in Table S10, and the product prices used to calculate these factors are given in Table S11.

Table S9. Mass-based allocation factors.

| <b>Scenario</b>                    | <b>1</b> | <b>2</b> | <b>3</b> | <b>4</b> | <b>5</b> | <b>6</b> | <b>7</b> | <b>8</b> |
|------------------------------------|----------|----------|----------|----------|----------|----------|----------|----------|
| <b>Isobutanol</b>                  | 0.384    | 0.485    | 0.342    | 0.396    | -        | -        | -        | -        |
| <b>Ethanol</b>                     | -        | -        | -        | -        | 0.466    | 0.569    | 0.398    | 0.456    |
| <b>Jet fuel<br/>(cycloalkanes)</b> | 0.212    | -        | 0.140    | -        | 0.184    | -        | 0.130    | -        |
| <b>Adipic acid</b>                 | 0.128    | 0.161    | 0.153    | 0.176    | 0.111    | 0.135    | 0.141    | 0.161    |
| <b>Isobutyl acetate</b>            | 0.144    | 0.182    | 0.205    | 0.237    | 0.125    | 0.153    | 0.189    | 0.217    |
| <b>Sodium sulfate</b>              | 0.132    | 0.171    | 0.160    | 0.191    | 0.114    | 0.142    | 0.141    | 0.167    |

Table S10. Economic value-based allocation factors.

| <b>Scenario</b>                    | <b>1</b> | <b>2</b> | <b>3</b> | <b>4</b> | <b>5</b> | <b>6</b> | <b>7</b> | <b>8</b> |
|------------------------------------|----------|----------|----------|----------|----------|----------|----------|----------|
| <b>Isobutanol</b>                  | 0.334    | 0.413    | 0.288    | 0.328    | -        | -        | -        | -        |
| <b>Ethanol</b>                     | -        | -        | -        | -        | 0.326    | 0.404    | 0.260    | 0.298    |
| <b>Jet fuel<br/>(cycloalkanes)</b> | 0.192    | -        | 0.123    | -        | 0.194    | -        | 0.128    | -        |
| <b>Adipic acid</b>                 | 0.262    | 0.324    | 0.303    | 0.345    | 0.266    | 0.329    | 0.315    | 0.361    |
| <b>Isobutyl acetate</b>            | 0.189    | 0.234    | 0.260    | 0.296    | 0.192    | 0.238    | 0.271    | 0.310    |
| <b>Sodium sulfate</b>              | 0.022    | 0.028    | 0.026    | 0.031    | 0.022    | 0.029    | 0.026    | 0.031    |

Table S11. Product prices used to calculate economic value allocation factors.

|                                | <b>Product Prices (USD/kg)</b> |
|--------------------------------|--------------------------------|
| <b>Isobutanol</b>              | 0.8                            |
| <b>Ethanol</b>                 | 0.55075                        |
| <b>Jet fuel (cycloalkanes)</b> | 0.83                           |
| <b>Adipic acid</b>             | 1.886                          |
| <b>Isobutyl acetate</b>        | 1.206                          |
| <b>Sodium sulfate</b>          | 0.156                          |

*Inventory Analysis*

The biorefinery inputs normalized to the production of 1 GGE alcohol product are given in Table S12 for scenarios 1 – 4 and in Table S13 for scenarios 5 – 8. The corn stover feedstock is assumed to have 12% moisture by mass, and the poplar feedstock 20% moisture by mass. Glucose is assumed to be sourced from corn wet milling, as is the corn steep liquor and ethanol. Methanol is assumed to be synthesized from natural gas to obtain a lower purchase price.

Two biorefinery inputs, the C<sub>16</sub> solvent and the polymer used in wastewater treatment, were excluded from the LCA system boundary due to a lack of reasonable proxy data. As both inputs were in small quantities (< 0.01 kg/GGE), this is expected to have no impact on the LCA conclusions.

Finally, Table S14 presents the GWP per GGE attributable to each biorefinery input for isobutanol (scenario 1) and ethanol (scenario 5).

Table S12. Biorefinery inputs per GGE of alcohol product, scenarios 1-4. Input units are in kg unless specified otherwise.

|                                         | <b>Scenario</b>         | <b>1</b> | <b>2</b> | <b>3</b> | <b>4</b> |
|-----------------------------------------|-------------------------|----------|----------|----------|----------|
| <b>Feedstock</b>                        | Poplar, bone dry        | 22.244   | 22.250   | 0        | 0        |
|                                         | Corn stover, bone dry   | 0        | 0        | 30.115   | 30.115   |
| <b>CELF</b>                             | Sulfuric acid, 100%     | 0.335    | 0.335    | 0.427    | 0.427    |
|                                         | Water, ultrapure        | 0.025    | 0.025    | 0.032    | 0.032    |
|                                         | Tetrahydrofuran         | 0.447    | 0.447    | 0.552    | 0.552    |
|                                         | Lime                    | 0.266    | 0.266    | 0.339    | 0.339    |
| <b>CBP to alcohol</b>                   | Glucose                 | 1.137    | 1.137    | 0.986    | 0.986    |
|                                         | Ammonia                 | 0.115    | 0.115    | 0.102    | 0.102    |
| <b>Fermentation to isobutyl acetate</b> | Ammonia                 | 0.080    | 0.080    | 0.127    | 0.127    |
| <b>Adipic acid</b>                      | Glucose                 | 0.071    | 0.071    | 0.087    | 0.087    |
|                                         | Ammonia                 | 0.013    | 0.013    | 0.024    | 0.024    |
|                                         | Diammonium phosphate    | 0.046    | 0.046    | 0.105    | 0.105    |
|                                         | Corn steep liquor       | 0.015    | 0.015    | 0.019    | 0.019    |
|                                         | Sulfuric acid, 100%     | 1.127    | 1.127    | 1.506    | 1.506    |
|                                         | Water, ultrapure        | 0.085    | 0.085    | 0.113    | 0.113    |
|                                         | Sodium hydroxide        | 0.231    | 0.231    | 0.308    | 0.308    |
|                                         | Ethanol                 | 5.53E-03 | 5.54E-03 | 7.18E-03 | 7.18E-03 |
|                                         | Hydrogen                | 0.061    | 0.061    | 0.079    | 0.079    |
| <b>AOR to jet fuel</b>                  | Methanol                | 0.910    | 0.000    | 0.675    | 0.000    |
| <b>Wastewater treatment</b>             | Sulfuric acid, 100%     | 2.62E-02 | 2.62E-02 | 6.44E-02 | 6.44E-02 |
|                                         | Water, ultrapure        | 1.97E-03 | 1.97E-03 | 4.85E-03 | 4.85E-03 |
|                                         | Ammonia                 | 1.42E-02 | 1.09E-02 | 2.14E-02 | 1.60E-02 |
|                                         | Sodium hydroxide        | 7.27E-03 | 7.29E-03 | 1.09E-02 | 1.09E-02 |
| <b>Boiler</b>                           | Boiler chemicals        | 2.90E-05 | 2.37E-05 | 3.22E-05 | 2.91E-05 |
|                                         | Lime                    | 4.89E-03 | 4.45E-03 | 2.81E-02 | 2.72E-02 |
|                                         | Ammonia                 | 0.218    | 0.209    | 0.409    | 0.398    |
|                                         | Natural gas (MMBTU)     | 0.270    | 0.115    | 0.277    | 0.175    |
| <b>Utilities</b>                        | Cooling tower chemicals | 1.19E-03 | 9.21E-04 | 1.29E-03 | 1.12E-03 |
|                                         | Makeup water            | 86.724   | 71.314   | 96.587   | 88.897   |
|                                         | Electricity (kWh)       | 0.000    | 0.218    | 0.164    | 0.824    |

Table S13. Biorefinery inputs per GGE of alcohol product, scenarios 5 – 8. Input units are in kg unless specified otherwise.

|                                         | <b>Scenario</b>         | <b>5</b> | <b>6</b> | <b>7</b> | <b>8</b> |
|-----------------------------------------|-------------------------|----------|----------|----------|----------|
| <b>Feedstock</b>                        | Poplar, bone dry        | 19.477   | 19.477   | 0        | 0        |
|                                         | Corn stover, bone dry   | 0        | 0        | 29.269   | 29.269   |
| <b>CELF</b>                             | Sulfuric acid, 100%     | 0.294    | 0.294    | 0.415    | 0.415    |
|                                         | Water, ultrapure        | 0.022    | 0.022    | 0.031    | 0.031    |
|                                         | Tetrahydrofuran         | 0.391    | 0.392    | 0.536    | 0.536    |
|                                         | Lime                    | 0.233    | 0.233    | 0.329    | 0.329    |
| <b>CBP to alcohol</b>                   | Glucose                 | 0.992    | 0.992    | 0.958    | 0.958    |
|                                         | Ammonia                 | 0.103    | 0.103    | 0.102    | 0.102    |
| <b>Fermentation to isobutyl acetate</b> | Ammonia                 | 0.070    | 0.070    | 0.124    | 0.124    |
| <b>Adipic acid</b>                      | Glucose                 | 0.062    | 0.062    | 0.084    | 0.084    |
|                                         | Ammonia                 | 0.012    | 0.012    | 0.023    | 0.023    |
|                                         | Diammonium phosphate    | 0.040    | 0.040    | 0.102    | 0.102    |
|                                         | Corn steep liquor       | 0.013    | 0.013    | 0.019    | 0.019    |
|                                         | Sulfuric acid, 100%     | 0.987    | 0.986    | 1.464    | 1.462    |
|                                         | Water, ultrapure        | 0.074    | 0.074    | 0.110    | 0.110    |
|                                         | Sodium hydroxide        | 0.203    | 0.202    | 0.300    | 0.299    |
|                                         | Ethanol                 | 4.85E-03 | 4.86E-03 | 6.97E-03 | 6.98E-03 |
|                                         | Hydrogen                | 0.053    | 0.053    | 0.076    | 0.076    |
| <b>AOR to jet fuel</b>                  | Methanol                | 0.797    | 0.000    | 0.657    | 0.000    |
| <b>Wastewater treatment</b>             | Sulfuric acid, 100%     | 2.29E-02 | 2.29E-02 | 6.26E-02 | 6.26E-02 |
|                                         | Water, ultrapure        | 1.73E-03 | 1.73E-03 | 4.71E-03 | 4.71E-03 |
|                                         | Ammonia                 | 2.33E-02 | 1.96E-02 | 6.01E-02 | 5.10E-02 |
|                                         | Sodium hydroxide        | 5.33E-03 | 4.84E-03 | 8.79E-03 | 7.94E-03 |
| <b>Boiler</b>                           | Boiler chemicals        | 1.74E-05 | 1.28E-05 | 2.10E-05 | 1.62E-05 |
|                                         | Lime                    | 4.36E-03 | 3.98E-03 | 2.73E-02 | 2.65E-02 |
|                                         | Ammonia                 | 0.188    | 0.180    | 0.393    | 0.381    |
|                                         | Natural gas (MMBTU)     | 0.134    | 0.000    | 0.124    | 0.000    |
| <b>Utilities</b>                        | Cooling tower chemicals | 5.46E-04 | 4.17E-04 | 6.76E-04 | 5.76E-04 |
|                                         | Makeup water            | 44.925   | 38.345   | 58.159   | 54.470   |
|                                         | Electricity (kWh)       | 2.402    | 3.325    | 3.885    | 4.081    |

Table S14. GWP per GGE attributable to each biorefinery input for isobutanol (scenario 1) and ethanol (scenario 5).

|                                               | <b>Isobutanol</b> | <b>Ethanol</b> |
|-----------------------------------------------|-------------------|----------------|
| <b>Process-level emissions</b>                | <b>13.62</b>      | <b>11.49</b>   |
| <b>Feedstock (poplar)</b>                     | <b>-15.11</b>     | <b>-16.06</b>  |
| Sulfuric acid                                 | 7.80E-02          | 8.29E-02       |
| Water, ultrapure (for sulfuric acid dilution) | 3.62E-05          | 3.85E-05       |
| Tetrahydrofuran                               | 1.20              | 1.27           |
| Lime                                          | 8.12E-02          | 8.63E-02       |
| <b>Glucose</b>                                | <b>0.25</b>       | <b>0.03</b>    |
| Ammonia                                       | 0.40              | 0.39           |
| Diammonium phosphate                          | 5.73E-02          | 6.08E-02       |
| Corn steep liquor                             | 5.16E-05          | 5.48E-05       |
| Sodium hydroxide                              | 6.29E-02          | 6.65E-02       |
| Ethanol                                       | 1.37E-03          | 1.46E-03       |
| Hydrogen                                      | 4.14E-02          | 4.40E-02       |
| Methanol                                      | 0.26              | 0.27           |
| Boiler water chemicals                        | 1.77E-05          | 1.28E-05       |
| Cooling tower chemicals                       | 9.82E-04          | 5.45E-04       |
| <b>Natural gas</b>                            | <b>2.34</b>       | <b>1.41</b>    |
| <b>Electricity</b>                            | <b>-0.35</b>      | <b>0.88</b>    |

Table S15. GWP attributable to each product in CELF-based biorefineries producing isobutanol (baseline data for Figure 7, main text).

| Scenario | Coproduct        | Production, kg/GGE main product | Baseline                                    | CELf-Based biorefinery                      |
|----------|------------------|---------------------------------|---------------------------------------------|---------------------------------------------|
|          |                  |                                 | GWP, kg CO <sub>2</sub> eq/GGE main product | GWP, kg CO <sub>2</sub> eq/GGE main product |
| 1        | Isobutanol       | 3.73                            | 11.15                                       | 2.93                                        |
|          | Cycloalkanes     | 2.07                            | 1.12                                        | 1.62                                        |
|          | Adipic acid      | 1.24                            | 30.18                                       | 0.98                                        |
|          | Isobutyl acetate | 1.40                            | 6.01                                        | 1.10                                        |
|          | Sodium sulfate   | 1.29                            | 0.74                                        | 1.01                                        |
|          | <b>TOTAL</b>     | -                               | <b>49.19</b>                                | <b>7.65</b>                                 |
| 2        | Isobutanol       | 3.73                            | 11.15                                       | 0.92                                        |
|          | Cycloalkanes     | 0.00                            | 0.00                                        | 0.00                                        |
|          | Adipic acid      | 1.24                            | 30.20                                       | 0.31                                        |
|          | Isobutyl acetate | 1.40                            | 6.01                                        | 0.35                                        |
|          | Sodium sulfate   | 1.32                            | 0.76                                        | 0.33                                        |
|          | <b>TOTAL</b>     | -                               | <b>48.12</b>                                | <b>1.90</b>                                 |
| 3        | Isobutanol       | 3.73                            | 11.15                                       | 4.05                                        |
|          | Cycloalkanes     | 1.53                            | 0.83                                        | 1.66                                        |
|          | Adipic acid      | 1.66                            | 40.46                                       | 1.81                                        |
|          | Isobutyl acetate | 2.23                            | 9.58                                        | 2.43                                        |
|          | Sodium sulfate   | 1.75                            | 1.01                                        | 1.90                                        |
|          | <b>TOTAL</b>     | -                               | <b>63.03</b>                                | <b>11.86</b>                                |
| 4        | Isobutanol       | 3.73                            | 11.15                                       | 3.29                                        |
|          | Cycloalkanes     | 0.00                            | 0.00                                        | 0.00                                        |
|          | Adipic acid      | 1.66                            | 40.46                                       | 1.47                                        |
|          | Isobutyl acetate | 2.23                            | 9.58                                        | 1.97                                        |
|          | Sodium sulfate   | 1.80                            | 1.04                                        | 1.59                                        |
|          | <b>TOTAL</b>     | -                               | <b>62.23</b>                                | <b>8.32</b>                                 |

Table S16. GWP attributable to each product in CELF-based biorefineries producing ethanol (baseline data for Figure 7, main text).

| Scenario | Coproduct        | Production, kg/GGE main product | Baseline                                    | CELf-Based biorefinery                      |
|----------|------------------|---------------------------------|---------------------------------------------|---------------------------------------------|
|          |                  |                                 | GWP, kg CO <sub>2</sub> eq/GGE main product | GWP, kg CO <sub>2</sub> eq/GGE main product |
| 5        | Ethanol          | 4.57                            | -19.10                                      | 0.04                                        |
|          | Cycloalkanes     | 1.81                            | 0.98                                        | 0.01                                        |
|          | Adipic acid      | 1.09                            | 26.43                                       | 0.01                                        |
|          | Isobutyl acetate | 1.23                            | 5.26                                        | 0.01                                        |
|          | Sodium sulfate   | 1.11                            | 0.64                                        | 0.01                                        |
|          | <b>TOTAL</b>     | -                               | <b>14.21</b>                                | <b>0.08</b>                                 |
| 6        | Ethanol          | 4.57                            | -19.10                                      | -2.83                                       |
|          | Cycloalkanes     | 0.00                            | 0.00                                        | 0.00                                        |
|          | Adipic acid      | 1.09                            | 26.41                                       | -0.67                                       |
|          | Isobutyl acetate | 1.23                            | 5.26                                        | -0.76                                       |
|          | Sodium sulfate   | 1.14                            | 0.66                                        | -0.71                                       |
|          | <b>TOTAL</b>     | -                               | <b>13.23</b>                                | <b>-4.98</b>                                |
| 7        | Ethanol          | 4.57                            | -19.10                                      | 2.45                                        |
|          | Cycloalkanes     | 1.49                            | 0.81                                        | 0.80                                        |
|          | Adipic acid      | 1.62                            | 39.32                                       | 0.87                                        |
|          | Isobutyl acetate | 2.17                            | 9.31                                        | 1.17                                        |
|          | Sodium sulfate   | 1.62                            | 0.93                                        | 0.87                                        |
|          | <b>TOTAL</b>     | -                               | <b>31.26</b>                                | <b>6.16</b>                                 |
| 8        | Ethanol          | 4.57                            | -19.10                                      | 0.21                                        |
|          | Cycloalkanes     | 0.00                            | 0.00                                        | 0.00                                        |
|          | Adipic acid      | 1.62                            | 39.30                                       | 0.08                                        |
|          | Isobutyl acetate | 2.17                            | 9.31                                        | 0.10                                        |
|          | Sodium sulfate   | 1.67                            | 0.96                                        | 0.08                                        |
|          | <b>TOTAL</b>     | -                               | <b>30.46</b>                                | <b>0.47</b>                                 |

## References

- [1] D.R. Vardon, M.A. Franden, C.W. Johnson, E.M. Karp, M.T. Guarnieri, J.G. Linger, M.J. Salm, T.J. Strathmann, G.T. Beckham, Adipic acid production from lignin, *Energy & Environmental Science*, 8 (2015) 617-628.
- [2] M.A. Franden, L.N. Jayakody, W.-J. Li, N.J. Wagner, N.S. Cleveland, W.E. Michener, B. Hauer, L.M. Blank, N. Wierckx, J. Klebensberger, G.T. Beckham, Engineering *Pseudomonas putida* KT2440 for efficient ethylene glycol utilization, *Metabolic Engineering*, 48 (2018) 197-207.
- [3] M. Gil, I. Arauzo, E. Teruel, Influence of Input Biomass Conditions and Operational Parameters on Comminution of Short-Rotation Forestry Poplar and Corn Stover Using Neural Networks, *Energy & Fuels*, 27 (2013) 2649-2659.
- [4] C.M. Cai, T. Zhang, R. Kumar, C.E. Wyman, THF co-solvent enhances hydrocarbon fuel precursor yields from lignocellulosic biomass, *Green Chemistry*, 15 (2013) 3140-3145.
- [5] T.Y. Nguyen, C.M. Cai, O. Osman, R. Kumar, C.E. Wyman, CELF pretreatment of corn stover boosts ethanol titers and yields from high solids SSF with low enzyme loadings, *Green Chemistry*, 18 (2016) 1581-1589.
- [6] P. Sengupta, C. Wyman, C. Cai, CELF Pretreatment Improves Ethanol Titers from High Solids SSF of Hardwood Poplar, *Biotechnology for Biofuels and Bioproducts*, (2022).
- [7] K. Barta, T.D. Matson, M.L. Fettig, S.L. Scott, A.V. Iretskii, P.C. Ford, Catalytic disassembly of an organosolv lignin via hydrogen transfer from supercritical methanol, *Green Chemistry*, 12 (2010) 1640-1647.
- [8] T.D. Matson, K. Barta, A.V. Iretskii, P.C. Ford, One-Pot Catalytic Conversion of Cellulose and of Woody Biomass Solids to Liquid Fuels, *Journal of the American Chemical Society*, 133 (2011) 14090-14097.
- [9] R. Davis, N. Grundl, L. Tao, M. Bidy, E. Tan, G.T. Beckham, D. Humbird, D.N. Thompson, M.S. Roni, Process Design and Economics for the Conversion of Lignocellulosic Biomass to Hydrocarbon Fuels and Coproducts: 2018 Biochemical Design Case Update, National Renewable Energy Laboratory, 2018, pp. 147.
